# Supplementary material for: Inferring the timing of abandonment of aggraded alluvial surfaces dated with cosmogenic nuclides
Source: Copernicus journal article supplement (doi:10.5194/esurf-7-755-2019), 2019-08-26
Supplement: Supplementary file 1 [file esurf-7-755-2019-supplement.zip]

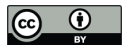

## *Supplement of*

# **Inferring the timing of abandonment of aggraded alluvial surfaces dated with cosmogenic nuclides**

**Mitch K. D’Arcy et al.**

*Correspondence to:* Mitch K. D’Arcy ([mdarcy@uni-potsdam.de](mailto:mdarcy@uni-potsdam.de))

- [esurf-7-755-2019-supplement-title-page.pdf](#)
- [ProbabilisticSamplingFans\\_final.m](#)
- [Supplementary ReadMe.pdf](#)

The copyright of individual parts of the supplement might differ from the CC BY 4.0 License.
